# Supplementary material for: Grapevine acclimation to water deficit: the adjustment of stomatal and hydraulic conductance differs from petiole embolism vulnerability
Source: PubMed Central journal article supplement (PMC5432590; doi:10.1007/s00425-017-2662-3), 2017-02-18
Supplement: 425_2017_2662_MOESM1_ESM.pdf [file 425_2017_2662_MOESM1_ESM.pdf]

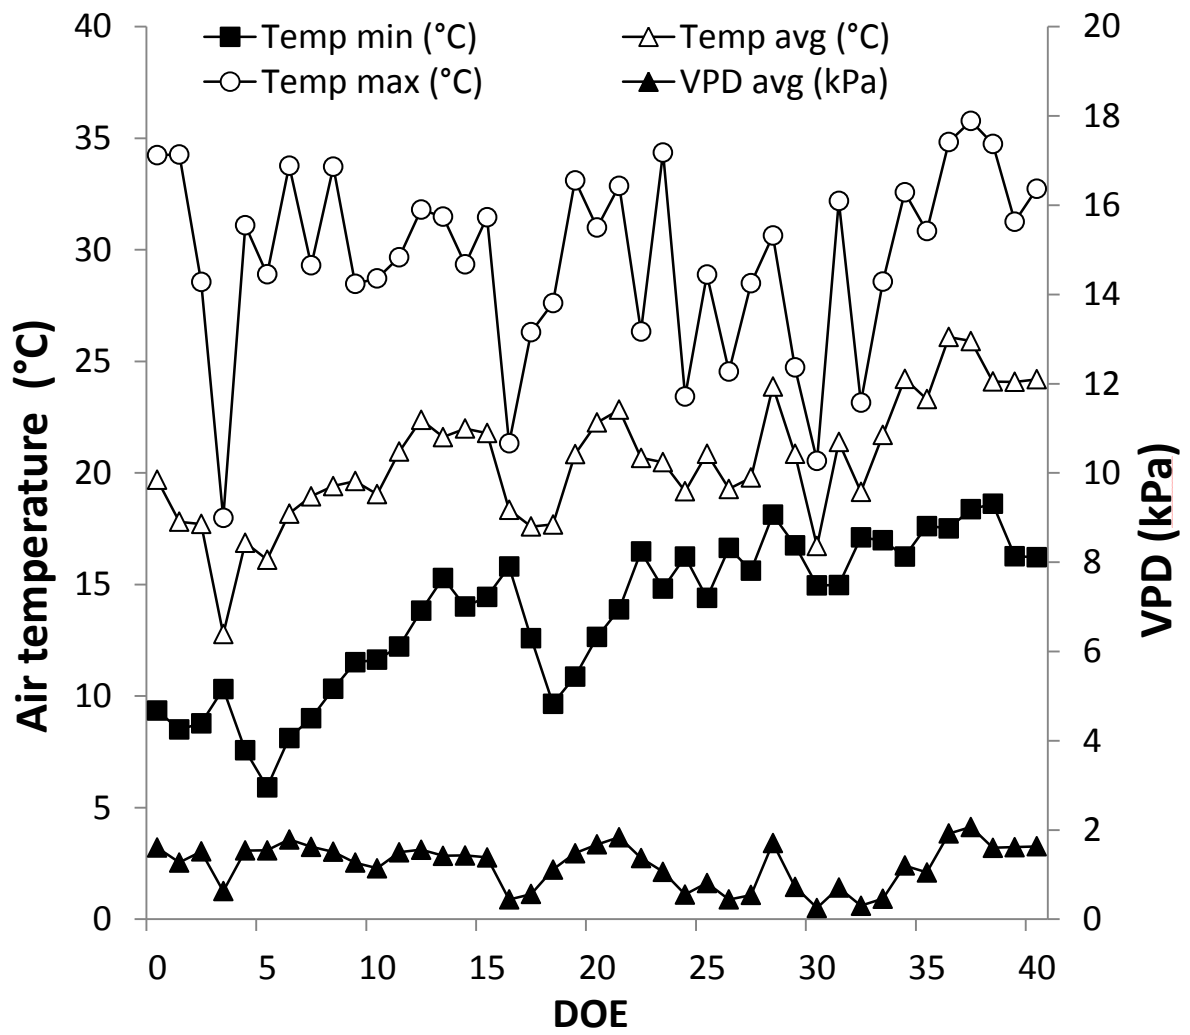

**Fig. S1** Daily air temperature (°C) and vapor pressure deficit (VPD, kPa) in the greenhouse during the course of the acclimation period
