# Supplementary material for: Grapevine acclimation to water deficit: the adjustment of stomatal and hydraulic conductance differs from petiole embolism vulnerability
Source: PubMed Central journal article supplement (PMC5432590; doi:10.1007/s00425-017-2662-3), 2017-02-18
Supplement: 425_2017_2662_MOESM3_ESM.pdf [file 425_2017_2662_MOESM3_ESM.pdf]

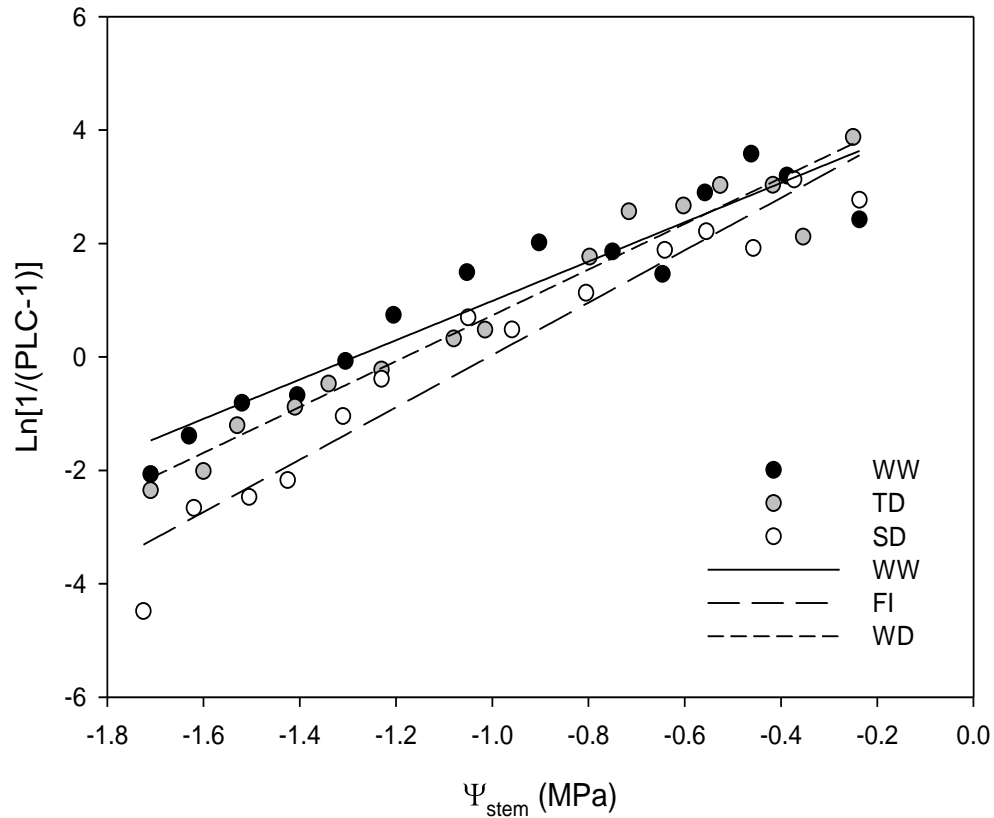

| Effect Tests |       |    |                |           |          |         |
|--------------|-------|----|----------------|-----------|----------|---------|
| Source       | Nparm | DF | Sum of Squares | F Ratio   | Prob>F   |         |
| $\Psi_s$     |       | 1  | 1              | 155.91356 | 469.1518 | <0.0001 |
| Treatment    |       | 2  | 2              | 6.67009   | 10.0353  | 0.0003  |

**Fig S3** Statistical comparison of the xylem vulnerability curves from the three acclimation treatments. The sigmoidal curves of well watered (WW), transient deficit (TD), and sustained deficit (SD) treatments from Fig. 3 were linearized and compared using a regression model with  $\Psi_s$  and the treatment as fixed model effects ( $P < 0.05$ )
