# Supplementary material for: Grapevine acclimation to water deficit: the adjustment of stomatal and hydraulic conductance differs from petiole embolism vulnerability
Source: PubMed Central journal article supplement (PMC5432590; doi:10.1007/s00425-017-2662-3), 2017-02-18
Supplement: 425_2017_2662_MOESM4_ESM.pdf [file 425_2017_2662_MOESM4_ESM.pdf]

**Table S1** Soil water content ( $\theta$ , %) in the WW, TD, and SD pots during the acclimation period (Fig. 2a). Different letters for each row (DOE= Days of Experiment) denotes significant differences ( $P<0.05$ ) between treatments as tested by Tukey HSD

| DOE | WW      | TD      | SD      |
|-----|---------|---------|---------|
| 2   | 42.29 a | 37.76 b | 38.10 b |
| 4   | 42.93 a | 34.86 b | 35.32 b |
| 5   | 41.35 a | 32.17 b | 30.95 b |
| 7   | 39.93 a | 26.76 b | 26.48 b |
| 9   | 38.95 a | 22.52 b | 21.14 b |
| 11  | 38.71 a | 16.76 b | 16.48 b |
| 13  | 37.76 a | 12.90 b | 11.90 b |
| 14  | 42.52 a | 29.76 b | 16.52 c |
| 16  | 42.57 a | 35.52 b | 12.81 c |
| 18  | 43.52 a | 39.67 a | 13.19 b |
| 19  | 43.71 a | 40.24 a | 12.14 b |
| 22  | 35.57 a | 24.24 b | 10.57 c |
| 24  | 35.71 a | 17.86 b | 11.00 c |
| 26  | 36.00 a | 14.71 b | 11.00 c |
| 28  | 42.10 a | 13.76 b | 10.90 b |
| 29  | 40.24 a | 11.52 b | 10.76 b |
| 30  | 38.19 a | 37.67 a | 11.10 b |
| 31  | 42.55 a | 39.86 a | 10.76 b |
| 32  | 42.26 a | 39.24 a | 10.76 b |
| 33  | 42.48 a | 39.81 a | 10.24 b |
| 34  | 41.57 a | 39.67 a | 9.57 b  |
| 35  | 38.81 a | 34.48 b | 9.48 c  |
| 37  | 39.38 a | 22.38 b | 8.95 c  |
| 39  | 40.05 a | 14.62 b | 9.00 c  |
| 40  | 41.43 a | 35.86 b | 29.95 c |
| 42  | 42.71 a | 37.10 b | 39.86 b |
| 46  | 44.46 a | 40.38 a | 42.51 a |
