# Supplementary material for: Grapevine acclimation to water deficit: the adjustment of stomatal and hydraulic conductance differs from petiole embolism vulnerability
Source: PubMed Central journal article supplement (PMC5432590; doi:10.1007/s00425-017-2662-3), 2017-02-18
Supplement: 425_2017_2662_MOESM5_ESM.pdf [file 425_2017_2662_MOESM5_ESM.pdf]

**Table S2** Stomatal conductance ( $g_s$ ,  $\text{H}_2\text{O mol m}^{-2} \text{s}^{-1}$ ) in the WW, TD, and SD vines during the acclimation period (Fig. 2b). Different letters for each row (DOE = Days of Experiment) denotes significant differences ( $P < 0.05$ ) between treatments as tested by Tukey HSD

| DOE | WW      | TD       | SD       |
|-----|---------|----------|----------|
| 0   | 0.349 a | 0.324 a  | 0.362 a  |
| 2   | 0.249 a | 0.173 a  | 0.219 a  |
| 5   | 0.216 a | 0.188 a  | 0.217 a  |
| 7   | 0.226 a | 0.156 b  | 0.182 ab |
| 9   | 0.281 a | 0.215 a  | 0.228 a  |
| 11  | 0.374 a | 0.294 ab | 0.215 b  |
| 13  | 0.378 a | 0.137 b  | 0.080 c  |
| 14  | 0.413 a | 0.250 b  | 0.151 c  |
| 16  | 0.273 a | 0.198 b  | 0.057 c  |
| 18  | 0.425 a | 0.354 b  | 0.180 c  |
| 19  | 0.375 a | 0.341 a  | 0.101 b  |
| 23  | 0.293 a | 0.305 a  | 0.053 b  |
| 28  | 0.563 a | 0.089 b  | 0.120 b  |
| 29  | 0.412 a | 0.056 b  | 0.079 b  |
| 30  | 0.455 a | 0.159 b  | 0.187 b  |
| 33  | 0.457 a | 0.319 a  | 0.176 b  |
| 34  | 0.422 a | 0.335 b  | 0.080 c  |
| 37  | 0.272 a | 0.250 a  | 0.033 b  |
| 39  | 0.278 a | 0.034 b  | 0.028 b  |
| 40  | 0.296 a | 0.081 b  | 0.101 b  |
| 42  | 0.388 a | 0.287 b  | 0.225 b  |
| 46  | 0.309 a | 0.258 a  | 0.271 a  |
