# Supplementary material for: Grapevine acclimation to water deficit: the adjustment of stomatal and hydraulic conductance differs from petiole embolism vulnerability
Source: PubMed Central journal article supplement (PMC5432590; doi:10.1007/s00425-017-2662-3), 2017-02-18
Supplement: 425_2017_2662_MOESM6_ESM.pdf [file 425_2017_2662_MOESM6_ESM.pdf]

**Table S3** Abscisic acid (ABA) concentration ( $\text{ng mg}^{-1}$  DW) in WW, TD, and SD leaves during the acclimation period (Fig. 2c). Different letters for each row (DOE = Days of Experiment) denotes significant differences ( $P < 0.05$ ) between treatments as tested by Tukey HSD. DW = Dry weight

| <b>DOE</b> | <b>WW</b> | <b>TD</b> | <b>SD</b> |
|------------|-----------|-----------|-----------|
| 13         | 2.35 b    | 11.35 a   | 7.98 a    |
| 19         | 1.78 b    | 2.10 b    | 16.65 a   |
| 29         | 0.93 c    | 18.13 a   | 6.65 b    |
| 34         | 0.98 b    | 1.18 b    | 11.50 a   |
| 39         | 2.30 c    | 19.53 a   | 11.58 b   |
