# Supplementary material for: Grapevine acclimation to water deficit: the adjustment of stomatal and hydraulic conductance differs from petiole embolism vulnerability
Source: PubMed Central journal article supplement (PMC5432590; doi:10.1007/s00425-017-2662-3), 2017-02-18
Supplement: 425_2017_2662_MOESM7_ESM.pdf [file 425_2017_2662_MOESM7_ESM.pdf]

**Table S4** Average leaf ( $k_{\text{leaf}}$ ), plant ( $k_{\text{plant}}$ ), and stomatal ( $g_s$ ) conductance at given classes of stem water potential ( $\Psi_s$ ). Values are from the post-acclimation three-day drought experiment. Data is presented as averages  $\pm$  SE ( $n=5-8$ ). Within a column and for each  $\Psi$  threshold, different letters identify significant differences between treatments ( $P<0.05$ ) as tested by Tukey-HSD

|                          | $\Psi_s$<br>(MPa)  | $k_{\text{leaf}}$<br>( $\text{mmol m}^{-2} \text{s}^{-1} \text{MPa}^{-1}$ ) | $k_{\text{plant}}$<br>( $\text{mmol m}^{-2} \text{s}^{-1} \text{MPa}^{-1}$ ) | $g_s$<br>( $\text{mol m}^{-2} \text{s}^{-1}$ ) |
|--------------------------|--------------------|-----------------------------------------------------------------------------|------------------------------------------------------------------------------|------------------------------------------------|
| $\Psi > -0.5$ MPa        |                    |                                                                             |                                                                              |                                                |
| WW                       | $-0.39 \pm 0.01$ a | $22.23 \pm 6.24$ a                                                          | $7.54 \pm 1.26$ a                                                            | $0.31 \pm 0.05$ a                              |
| TD                       | $-0.42 \pm 0.01$ a | $25.20 \pm 8.88$ a                                                          | $5.62 \pm 0.70$ a                                                            | $0.25 \pm 0.02$ a                              |
| SD                       | $-0.41 \pm 0.02$ a | $23.70 \pm 3.63$ a                                                          | $7.12 \pm 0.57$ a                                                            | $0.29 \pm 0.02$ a                              |
| $-0.7 < \Psi < -0.5$ MPa |                    |                                                                             |                                                                              |                                                |
| WW                       | $-0.55 \pm 0.02$ a | $6.62 \pm 3.17$ b                                                           | $2.00 \pm 0.38$ b                                                            | $0.08 \pm 0.02$ b                              |
| TD                       | $-0.59 \pm 0.02$ a | $11.18 \pm 8.55$ ab                                                         | $2.42 \pm 0.75$ b                                                            | $0.12 \pm 0.04$ ab                             |
| SD                       | $-0.58 \pm 0.03$ a | $17.43 \pm 5.42$ a                                                          | $3.96 \pm 0.93$ a                                                            | $0.20 \pm 0.05$ a                              |
| $\Psi < -0.7$ MPa        |                    |                                                                             |                                                                              |                                                |
| WW                       | $-0.83 \pm 0.03$ a | $3.54 \pm 1.22$ b                                                           | $0.65 \pm 0.34$ b                                                            | $0.06 \pm 0.03$ b                              |
| TD                       | $-0.74 \pm 0.02$ a | $3.06 \pm 0.96$ b                                                           | $0.43 \pm 0.12$ b                                                            | $0.03 \pm 0.01$ b                              |
| SD                       | $-0.78 \pm 0.02$ a | $9.13 \pm 2.10$ a                                                           | $1.76 \pm 0.56$ a                                                            | $0.15 \pm 0.05$ a                              |
